# Supplementary material for: Formulating Resveratrol and Melatonin Self-Nanoemulsifying Drug Delivery Systems (SNEDDS) for Ocular Administration Using Design of Experiments
Source: MDPI journal article supplement (doi:10.3390/pharmaceutics16010125), 2024-01-18
Supplement: s1 [file s1]

Supplementary Table S1. Physico-chemical properties of melatonin and resveratrol.

| Drug                     | Molecular mass<br>(g/mol) | m.p.<br>°C | Solubility             | LogP | Form/<br>colour                       | Storage/<br>stability                 | Toxicity                       |
|--------------------------|---------------------------|------------|------------------------|------|---------------------------------------|---------------------------------------|--------------------------------|
| <b>Melatonin</b>         | 232.30                    | 114 to 124 | Methanol<br>(50 mg/ml) | 1.65 | White to slightly<br>yellow<br>powder | +2°C to +8°C<br>Protect from<br>light | None -<br>Standard<br>handling |
| <b>Trans-Resveratrol</b> | 228.24                    | 250-257    | DMSO<br>(50 mg/ml)     | 3.1  | Off-white<br>powder                   | +2°C to +8°C<br>Protect from<br>light | None -<br>Standard<br>handling |
